# Supplementary material
Source: PubMed Central journal article supplement (PMC1314716)
Supplement: 2003-074-s1.pdf [file 2003-074-s1.pdf]

Supplementary table 1. Prevalence of long-term social and emotional problems among patients and carers.<sup>a</sup>

| Examples                         | Study              | Methodology (source of participants; data collection; tool)                              | Time post stroke | Prevalence |                 |
|----------------------------------|--------------------|------------------------------------------------------------------------------------------|------------------|------------|-----------------|
|                                  |                    |                                                                                          |                  | n          | %               |
| Depression                       | 2000 <sup>31</sup> | Early hospital discharges; face-to-face; HADS (>8)                                       | 41 days          | 125        | 62              |
|                                  | 1987 <sup>34</sup> | Community sample; WDI (>18)                                                              | 1 week           | 350        | 18              |
|                                  | 1987 <sup>34</sup> | Former in-patients; GHQ-28 (>12)                                                         | 6 months         | 149        | 23              |
|                                  | 1997 <sup>22</sup> | Community-based register; face-to face; HADS (≥11)                                       | 5 years          | 96         | 23              |
|                                  | 1986 <sup>8</sup>  | Source NS; face-to-face; WDS (≥15)                                                       | 1 years          | 246        | <sup>a</sup> 11 |
|                                  | 1997 <sup>22</sup> | See above; HADS (≥11)                                                                    | 5 years          | 37         | <sup>a</sup> 14 |
| Anti-depressants                 | 1991 <sup>12</sup> | Hospital admissions; face-to-face; self-report, unconfirmed                              | 3 years          | 19         | 5               |
| Anxiety                          | 1997 <sup>22</sup> | See note <sup>b</sup> ; HADS (≥11)                                                       | 5 years          | 96         | 19              |
|                                  | 2000 <sup>31</sup> | See note <sup>b</sup> ; HADS (>10)                                                       | 41 days          | 125        | 20              |
|                                  | 1986 <sup>8</sup>  | See note <sup>b</sup> ; self-report                                                      | 6 months         | 223        | <sup>a</sup> 43 |
| Emotional distress               | 1991 <sup>12</sup> | See note <sup>b</sup> ; CSI (>6)                                                         | 3 years          | 44         | <sup>a</sup> 30 |
|                                  | 1998 <sup>26</sup> | Via hospital admissions; face-to-face; GHQ-30 (>4/5)                                     | 6 months         | 187        | <sup>a</sup> 55 |
| Increased irritability           | 1986 <sup>8</sup>  | See note <sup>b</sup> ; Self-report                                                      | 6 months         | 223        | <sup>a</sup> 28 |
| Personal mental health worries   | 2001 <sup>32</sup> | Advertising, mail shot and targeted mailing; postal survey; RR — 23%; self-report.       | 60% <5 years     | 1265       | <sup>a</sup> 56 |
| Poor adjustment                  | 1982 <sup>6</sup>  | Hospital stroke unit; face-to-face; self-report.                                         | 2–3 years        | 92         | 36              |
| Unable to go to shops            | 1987 <sup>9</sup>  | Hospital register; face-to-face; self-report item in ranked activities of daily living.  | 6 months         | 183        | 38              |
| Return to driving                | 1982 <sup>6</sup>  | See note <sup>b</sup> ; self-report                                                      | 2–3 years        | 26         | 19              |
| Give up work                     | 1996 <sup>21</sup> | Via hospital; face-to-face; self-report                                                  | 3 months         | 16         | <sup>a</sup> 25 |
| Stigmatisation                   | 1992 <sup>14</sup> | GP register; face-to-face; self-report                                                   | 9 months         | 110        | 20              |
| Poorer relationship with patient | 1992 <sup>14</sup> | See note <sup>b</sup> ; self-report                                                      | 18 months        | 76         | <sup>a</sup> 38 |
| Poorer relationship with spouse  | 1982 <sup>6</sup>  | See note <sup>b</sup> ; self-report                                                      | 2–3 years        | 92         | 18              |
| Poorer sexual relationship       | 1982 <sup>6</sup>  | See note <sup>b</sup> ; self-report                                                      | 2–3 years        | 50         | <sup>a</sup> 38 |
| Social isolation                 | 1992 <sup>14</sup> | See note <sup>b</sup> ; self-report                                                      | 18 months        | 93         | 33              |
|                                  | 1991 <sup>12</sup> | See note <sup>b</sup> ; self-report item in NHP                                          | 3 years          | 44         | <sup>a</sup> 17 |
| Fear of patient falling          | 1995 <sup>19</sup> | Via hospital admissions; face-to-face; self-report; pre-stroke fall rate used as control | 6 months         | 72         | <sup>a</sup> 46 |

<sup>a</sup>Carer prevalence estimates. <sup>b</sup>Methodological details of study provided earlier in table, see appropriate reference. HADS = hospital anxiety and depression scale; WDI = Wakefield depression inventory; GHQ = general health questionnaire; NS = not specified; WDS = Wakefield Depression Scale; CSI = carer strain index; RR = response rate; NHP = Nottingham health profile; PD = post discharge.
