# Supplementary material
Source: PubMed Central journal article supplement (PMC1314716)
Supplement: 2003-074-s2.pdf [file 2003-074-s2.pdf]

Supplementary table 2. Prevalence of longer-term service-related problems.

| Examples                                 | Study              | Methods (source of participants; data collection; response rate; comment)                                      | Time post-stroke     | Prevalence |    |
|------------------------------------------|--------------------|----------------------------------------------------------------------------------------------------------------|----------------------|------------|----|
|                                          |                    |                                                                                                                |                      | <i>n</i>   | %  |
| Referred but not receiving OT            | 2000 <sup>28</sup> | Hospital admissions; case-note audit.                                                                          | 6 weeks <sup>a</sup> | 11         | 40 |
| Referred but not receiving PT            |                    |                                                                                                                | 6 weeks <sup>a</sup> | 21         | 35 |
| Dissatisfaction: amount of PT            | 2000 <sup>29</sup> | Community rehabilitation lists; postal survey — modified Homesat <sup>b</sup> ; RR = 62%                       | 18 months            | 98         | 30 |
| Contact with SSOT                        | 1998 <sup>25</sup> | GP register of non-admissions; face-to-face interviews; data not validated                                     | 1 month              | 93         | 13 |
| Financial concerns                       | 1998 <sup>25</sup> | See note <sup>c</sup>                                                                                          | 1 month              | 93         | 20 |
| Difficulty getting bath aids             | 1987 <sup>9</sup>  | Hospital register; face-to-face interviews; data not validated                                                 | 6 months             | 96         | 53 |
| Major housing problems                   | 1996 <sup>21</sup> | Hospital admissions; face-to-face interviews with carers                                                       | 3 months             | 50         | 24 |
| Had contact with GP                      | 1997 <sup>24</sup> | Hospital admissions; mainly postal survey with some face-to-face interviews; RR = 43%; data validated with GPs | 6 weeks <sup>a</sup> | 96         | 77 |
|                                          | 1987 <sup>9</sup>  | See note <sup>c</sup> .                                                                                        | 6 months             | 183        | 53 |
|                                          | 1986 <sup>7</sup>  | Population-based stroke register; face-to-face interviews; data not validated                                  | 1 year               | 383        | 44 |
| GP contact helpful                       | 1997 <sup>24</sup> | See note <sup>c</sup>                                                                                          | 6 weeks <sup>a</sup> | 96         | 59 |
| Dissatisfaction with domiciliary support | 1994 <sup>17</sup> | Hospital stroke register; postal questionnaire — Homesat <sup>b</sup> ; RR = 87%.                              | 6 month              | 120        | 32 |

<sup>a</sup>Post discharge. <sup>b</sup>Validated satisfaction questionnaire. <sup>c</sup>Methodological details of study provided earlier in table, see appropriate reference. OT = occupational therapy; PT = physiotherapy; RR = response rate; SSOT = social services occupational therapy.
