# Supplementary material
Source: PubMed Central journal article supplement (PMC1314716)
Supplement: 2003-074-s3.pdf [file 2003-074-s3.pdf]

Supplementary table 3. Prevalence of problems relating to transfer of care, communication and other areas reported by patients and carers. <sup>a</sup>

| Examples                                                                         | Study              | Comment (source of participants; methodology; response rate; comment)                                                                                                          | Time post stroke     | Prevalence<br><i>n</i> | Prevalence<br>% |
|----------------------------------------------------------------------------------|--------------------|--------------------------------------------------------------------------------------------------------------------------------------------------------------------------------|----------------------|------------------------|-----------------|
| <b>Transfer of care</b>                                                          |                    |                                                                                                                                                                                |                      |                        |                 |
| Pre-discharge assessments: using the phone, managing money, shopping and laundry | 2000 <sup>28</sup> | Hospital admissions; case note audit                                                                                                                                           | 6 weeks <sup>b</sup> | 38                     | 0–12            |
| Dissatisfaction: discharge preparation                                           | 1994 <sup>17</sup> | Hospital stroke register; postal survey using validated Hospsat <sup>c</sup> ; RR = 87%                                                                                        | 6 months             | 120                    | 33              |
| Carers feeling unprepared (information and/or advice)                            | 1992 <sup>14</sup> | Via GP register (54% practices participating); face-to-face; self-report                                                                                                       | 9 months             | 94                     | 33              |
|                                                                                  | 1992 <sup>14</sup> |                                                                                                                                                                                | 18 months            | 76                     | 72              |
| <b>Communication</b>                                                             |                    |                                                                                                                                                                                |                      |                        |                 |
| Lack of written information                                                      | 1994 <sup>16</sup> | Hospital admissions; face-to-face; findings not validated                                                                                                                      | 4 weeks <sup>b</sup> | 65                     | 88              |
|                                                                                  |                    |                                                                                                                                                                                | 4 weeks <sup>b</sup> | 80 <sup>a</sup>        | 81              |
| Dissatisfaction – benefits information                                           | 1994 <sup>17</sup> | See note <sup>d</sup> ; Uses Homesat <sup>c</sup>                                                                                                                              | 6 months             | 120                    | 32              |
| Unhappy with advice and/or information                                           | 2000 <sup>29</sup> | Community rehabilitation lists; postal survey – modified Homesat <sup>c</sup> ; RR = 62%                                                                                       | 18 months            | 98                     | 18              |
| <b>Other areas</b>                                                               |                    |                                                                                                                                                                                |                      |                        |                 |
| Urinary incontinence                                                             | 2000 <sup>33</sup> | Population-based register; face-to-face interview and postal questionnaire; excludes pre-stroke incontinence; clear definition of incontinence provided                        | 2 years              | 123                    | 10              |
| Ongoing health concerns                                                          | 1982 <sup>6</sup>  | Hospital stroke unit; face-to-face interview; self-report                                                                                                                      | 2–3 years            | 79                     | 40              |
| Falls                                                                            | 1995 <sup>19</sup> | Hospital admissions and participating in concurrent RCT; face-to-face interview; excludes patients with Barthel ADL of 20, <60 years old or in institutional care; self-report | 6 months             | 108                    | 73              |
|                                                                                  | 2000 <sup>27</sup> |                                                                                                                                                                                | 6 months             | 220                    | 36              |
|                                                                                  |                    |                                                                                                                                                                                | 18–30 months         | 154                    | 45              |
| Shoulder pain                                                                    | 2000 <sup>27</sup> | See note <sup>d</sup> ; defined as requiring analgesia on ≥ 2 consecutive days                                                                                                 | 6 months             | 220                    | 15              |
| Carer ill-health (headaches, pain, tiredness)                                    | 1996 <sup>21</sup> | Via hospital admissions; face-to-face interview; self-report; excludes carers of patients with SAH, recurrent stroke and living in institutional care                          | 12 months            | 50                     | 32–48           |

<sup>a</sup>Carer report. <sup>b</sup>Post discharge. <sup>c</sup>Validated satisfaction questionnaire. <sup>d</sup>Methodological details of study provided earlier in table, see appropriate reference. RR = response rate; RCT = randomised controlled trial; ADL = activities of daily living; SAH = sub-arachnoid haemorrhage.
